# Supplementary material
Source: PubMed Central journal article supplement (PMC2397368)
Supplement: 107.120345v2_1.pdf [file 107.120345v2_1.pdf]

## Three-dimensional Resolution Doubling in Widefield Fluorescence Microscopy by Structured Illumination

### Supplementary videos

**Video 1.** Maximum intensity projection through a 3D SIM reconstruction of the actin cytoskeleton in an HL-60 cell that has differentiated to a neutrophil-like state, and has been briefly exposed to its target chemoattractant fMLP.

**Video 2.** Maximum intensity projection through a 3D SIM reconstruction of the microtubule cytoskeleton in a HeLa cell. Scale bar 2  $\mu\text{m}$ .

**Video 3.** Maximum intensity projection through a 3D SIM reconstruction of the synaptonemal complex (SC) in a maize meiocyte nucleus during the late zygotene stage of meiosis. Two components of the axial/lateral element of the SC are labeled: AFD1 (displayed as magenta) and ASY1 (green). Scale bar 5  $\mu\text{m}$ .
