# Supplementary material
Source: PubMed Central journal article supplement (PMC2397368)

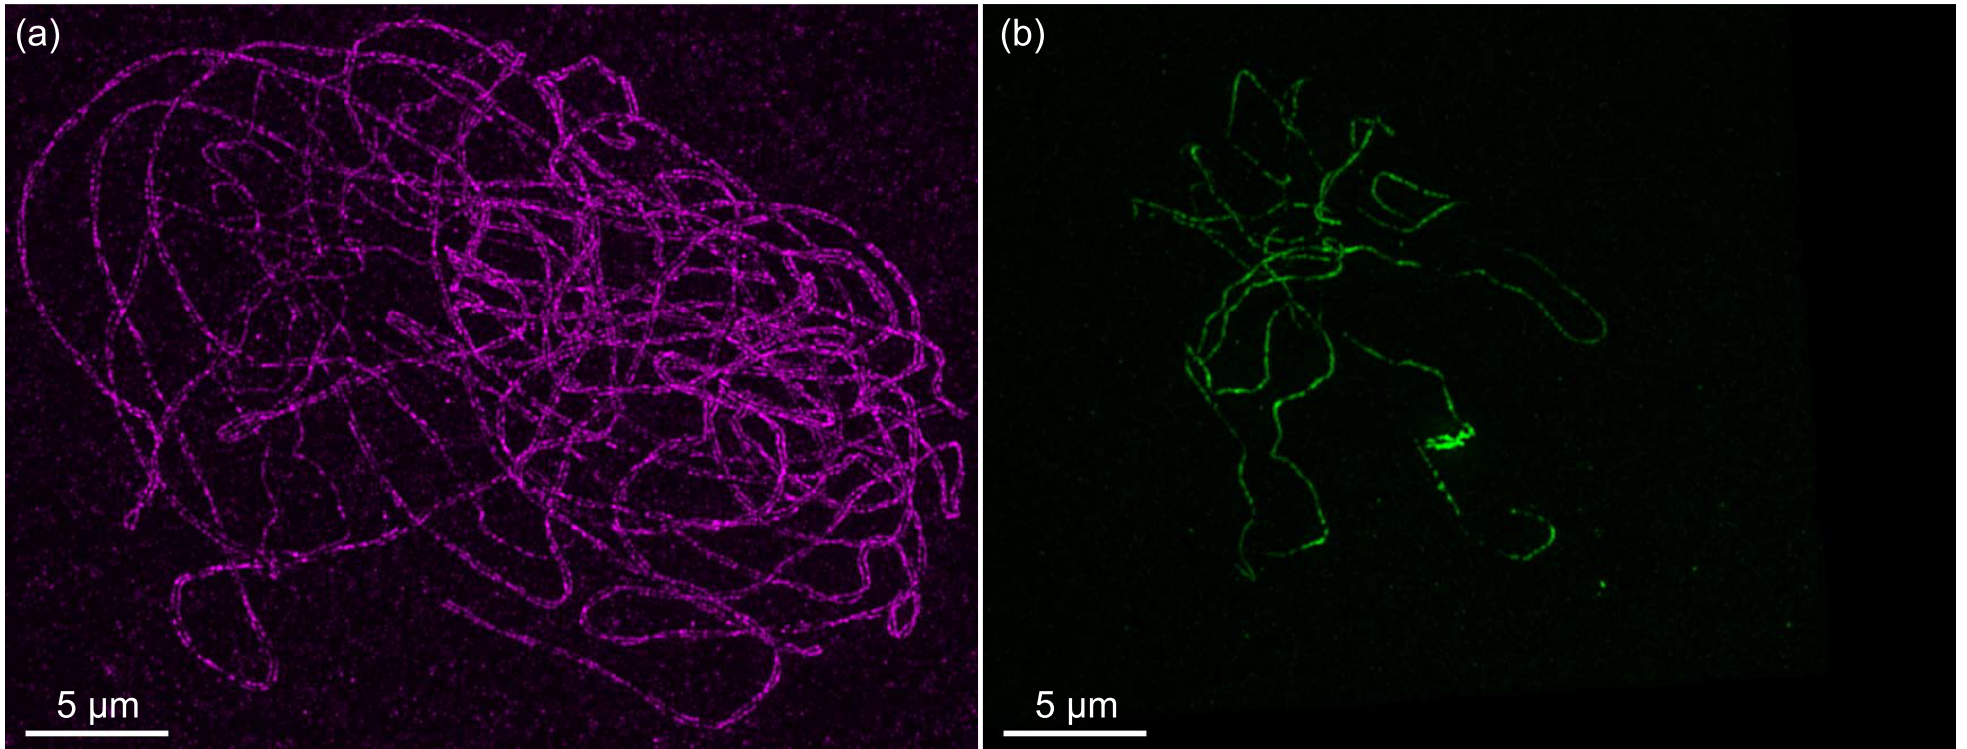

Figure S1. The AFD1 (a) and ASY1 (b) channels from Fig. 7, displayed separately

Supplement: 107.120345v2_2.pdf [file 107.120345v2_2.pdf]
